# Supplementary material for: Enhanced efficiency of genetic programming toward cardiomyocyte creation through topographical cues
Source: PubMed Central journal article supplement (PMC4823279; doi:10.1016/j.biomaterials.2015.07.063), 2015-11
Supplement: mmc1.pdf [file mmc1.pdf]

# Supporting Information

## SI Figure Legends

### Figure S1

Clone SP3 on the microgrooved substrate. (A) Actin cytoskeleton (Phalloidin, green), and nuclear (DAPI, blue) staining of SP3 cells cultured for 3 days on flat and patterned substrates (scale bar: 200 $\mu$ m). (B) Scatter plot showing the nuclear elongation (aspect ratio of nuclei elliptical fitting) as a function of each cell's alignment along the grooves (angle between long axis and grooves). Cells on patterned substrates align within 10° parallel to the grooves and are significantly more elongated:  $0.52 \pm 0.14$  on the microgrooved surface versus  $0.72 \pm 0.13$  ( $p < 10^{-5}$ ). (C) EdU incorporation analysis showing decreased clone SP3 proliferation on grooves (\*  $p < 0.05$  for Student's t-test, error bars indicate standard deviation,  $n=3$ ).

### Figure S2

Nuclear volume of clone SP16 as evaluated through confocal imaging (20 slices per nucleus) is significantly reduced on the grooved substrates. (\*\*\*)  $p < 0.001$ ; Student's t-test,  $n=3$ , error bars indicate standard deviation).

### Figure S3

Correlation analysis between nuclear elongation and histone 3 acetylation levels. (A) Scatter plots showing nuclear elongation (y-axis) along histone 3 acetylation (x-axis) and a linear fit (mean-square regression). (B) Average slopes and correlation coefficients between flat and patterned substrates (\*\*  $p < 0.01$ ; Student's t-test,  $n=3$ , error bars indicate standard deviation). (C) Density plot representing the distribution of histone 3 acetylation levels showing a clear shift toward the right on patterned surfaces.

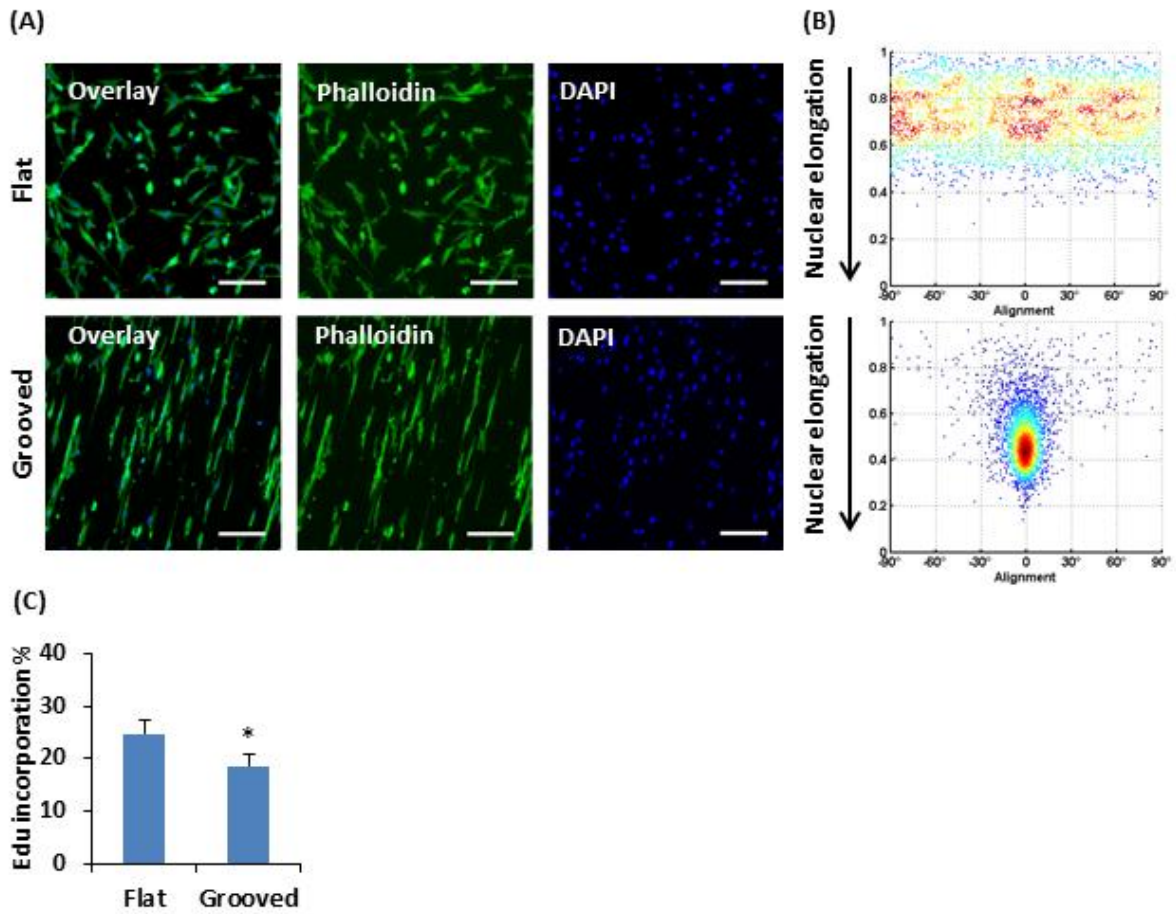

Figure S1

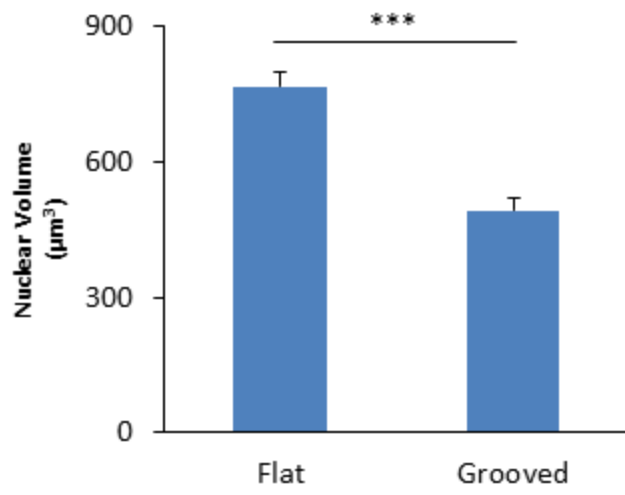

**Figure S2**

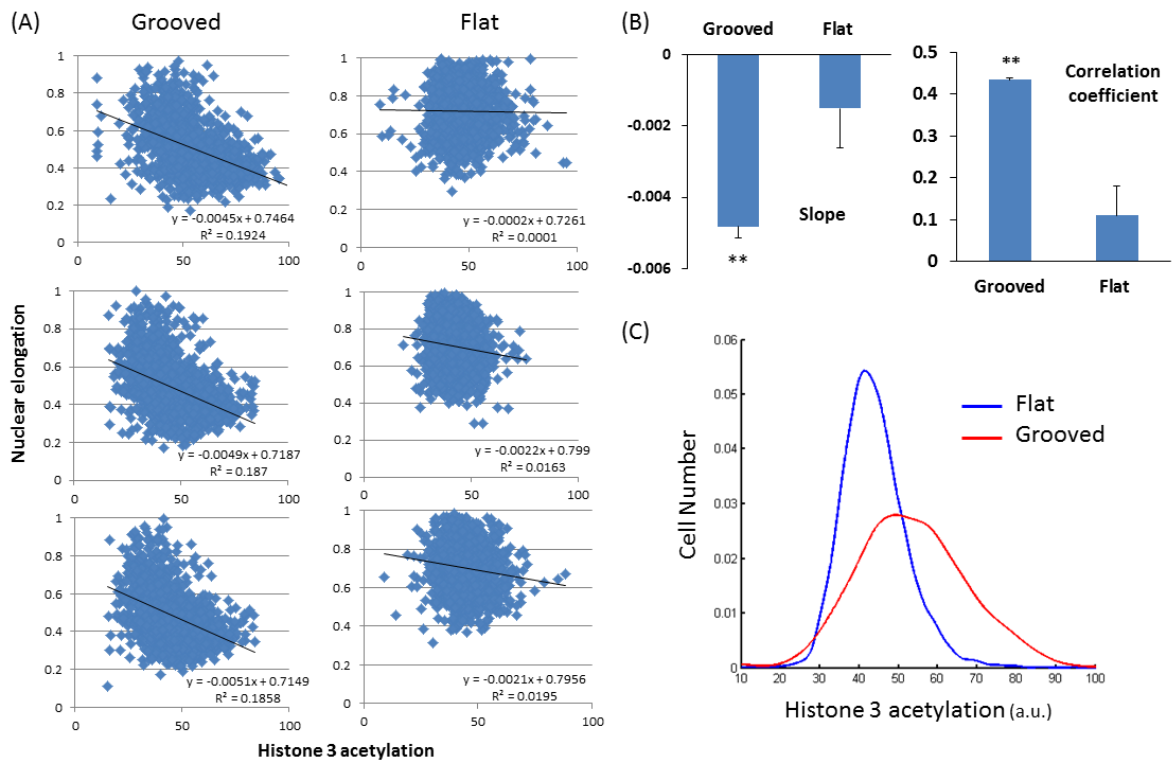

**Figure S3**
